# Supplementary material
Source: PubMed Central journal article supplement (PMC3374459)
Supplement: clpt2011355x1.pdf [file clpt2011355x1.pdf]

*B\*07:02:01* 1 ATGCTGGTCA TGGCG CCCCAGAACCGTCCTCCTGCTGCTCT DGG DGG CCG TGGCCCTGACCGAGACCTGGGCC 72  
*B\*57:01:01* 1 ATGCTGGTCA CCGCA CCCCAGAACCGTCCTCCTGCTGCTCT GGG GGG CAG TGGCCCTGACCGAGACCTGGGCC 72

*B\*07:02:01* 73 GGCTCCCACTCCATGAGGTATTTCTACACD TCCG TG TCCCGGCCCGGCCGCGGGGAGCCCCGCTTCATC CA 144  
*B\*57:01:01* 73 GGCTCCCACTCCATGAGGTATTTCTACACD GCCA TG TCCCGGCCCGGCCGCGGGGAGCCCCGCTTCATC CA 144

*B\*07:02:01* 145 GTGGGCTACGTGGACGACACCCAGTTTCGTGAGGTTTCGACAGCGACGCCGCGAGTCCGAG AGAGG AGCC GCG 216  
*B\*57:01:01* 145 GTGGGCTACGTGGACGACACCCAGTTTCGTGAGGTTTCGACAGCGACGCCGCGAGTCCGAG GATGG DGGC DCG 216

*B\*07:02:01* 217 GCGCC GTGGATAGAGCAGGAGGGGCCGAGATTATGGGAC DGG A CACAG A GATCTAC AAGGCC CAGGC ACAG 288  
*B\*57:01:01* 217 GCGCC ATGGATAGAGCAGGAGGGGCCGAGATTATGGGAC GGG A GACAG G A C A T G A A G G C C T C G C C A G 288

*B\*07:02:01* 289 ACTGACCGAGAGA CCTGCGGA C C T G C G C G G C T A C T A C A A C C A G A G C G A G G C C G G G T C T C A C A C C T C C A G 360  
*B\*57:01:01* 289 ACTTACCGAGAGA C C T G C G G A T C G C G C T C G C T A C T A C A A C C A G A G C G A G G C C G G G T C T C A C A C C A T C C A G 360

*B\*07:02:01* 361 AGCATATGTA DGGCTGCGACGTGGGGCCGGACGGGCGCCTCCTCCGCGGGCATGACCAAGT ACGCCTACGACGGC 432  
*B\*57:01:01* 361 GTGATGTA TGGCTGCGACGTGGGGCCGGACGGGCGCCTCCTCCGCGGGCATGACCAAGT CDGCTACGACGGC 432

*B\*07:02:01* 433 AAGGATTACATCGCCCTGAACGAGGACCTG D G C T C C T G G A C C G C G C G G A C A C G G C T C A G A T C A C C C A G 504  
*B\*57:01:01* 433 AAGGATTACATCGCCCTGAACGAGGACCTG AGCTCCTGGACC G C G C G G A C A C G G C G G C T C A G A T C A C C C A G 504

*B\*07:02:01* 505 CGCAAAGTGGGAGGCGGCCCGTG A G G C G G A G C A G C G G A G A G C C T A C C T G G A G G G C G A G T G C G T G G A G T G G C T C 576  
*B\*57:01:01* 505 CGCAAAGTGGGAGGCGGCCCGTG TGGCGGAGCAGCG GAGAGCCTACCTGGAGGGC D T G T G C G T G G A G T G G C T C 576

*B\*07:02:01* 577 CGCAGATACCTGGAGAACGGGAAGGA G A G C T G G A G C G C G C G A C C C C C A A A G A C A C A C G T G A C C C A C C A C 648  
*B\*57:01:01* 577 CGCAGATACCTGGAGAACGGGAAGGA G A G C T G G A G C G C G C G A C C C C C A A A G A C A C A T G T G A C C C A C C A C 648

*B\*07:02:01* 649 CCCATCTCTGACCATGAGGCCACCCCTGAGGTGCTGGGCCCTGGG T T T C T A C C C T G C G G A G A T C A C A C T G A C C 720  
*B\*57:01:01* 649 CCCATCTCTGACCATGAGGCCACCCCTGAGGTGCTGGGCCCTGGG D T T C T A C C C T G C G G A G A T C A C A C T G A C C 720

*B\*07:02:01* 721 TGGCAGCGGGATGGCGAGGACCAAACCTCAGGACAC D G A G C T T G T G G A G A C C A G A C C A G C A G G A G A T A G A A C C 792  
*B\*57:01:01* 721 TGGCAGCGGGATGGCGAGGACCAAACCTCAGGACAC D G A G C T T G T G G A G A C C A G A C C A G C A G G A G A T A G A A C C 792

*B\*07:02:01* 793 TTCCAGAAAGTGGGCAAGCTGTGGTGGTG CCTTCTGGGAGAAAGCAGAGATACACATGCCATGTACAGCATGAG 864  
*B\*57:01:01* 793 TTCCAGAAAGTGGGCAAGCTGTGGTGGTG CCTTCTGGGAGAAAGCAGAGATACACATGCCATGTACAGCATGAG 864

*B\*07:02:01* 865 GGGCTGCGCA AAGCCCTCACCCCTGAGATGGGAGCC G T C T T C C C A G T C C A C C G T C C C C A T C G T G G G C A T T G T T 936  
*B\*57:01:01* 865 GGGCTGCGCA AAGCCCTCACCCCTGAGATGGGAGCC A T C T T C C C A A T C C A C C G T C C C C A T C G T G G G C A T T G T T 936

*B\*07:02:01* 937 GCTGGCCCTGGCTGTCTTAGCAAGTTGTGGTTCATCGGAGCTGTGGTCGCTGCTGTGATGTGTAGGAGGAAGAG T 1008  
*B\*57:01:01* 937 GCTGGCCCTGGCTGTCTTAGCAAGTTGTGGTTCATCGGAGCTGTGGTCGCTGCTGTGATGTGTAGGAGGAAGAG D 1008

*B\*07:02:01* 1009 TCAGGTGGAAAAGGAGGGAGCTACTCTCAGGCTGCGTGCAGCGACAGTGCCAGGGCTCTGATGTGTCTCTC 1080  
*B\*57:01:01* 1009 TCAGGTGGAAAAGGAGGGAGCTACTCTCAGGCTGCGTGCAGCGACAGTGCCAGGGCTCTGATGTGTCTCTC 1080

*B\*07:02:01* 1081 ACAGCTTGA 1089  
*B\*57:01:01* 1081 ACAGCTTGA 1089

**Supplementary Figure S1. Nucleotide coding sequence alignment of *HLA-B\*57:01:01* and the reference sequence *HLA-B\*07:02:01*.** Nucleotide differences between the two sequences are highlighted in grey. This alignment was generated using the IMGT/HLA Database's alignment tool ([www.ebi.ac.uk/imgt/hla/align.html](http://www.ebi.ac.uk/imgt/hla/align.html)) and visualized in Jalview.
