# Supplementary material
Source: PubMed Central journal article supplement (PMC3374459)
Supplement: clpt2011355x3.pdf [file clpt2011355x3.pdf]

| <b>Supplemental Table S1</b><br><b>Frequencies of alleles<sup>1</sup> in major racial/ethnic groups<sup>2</sup></b> |                       |                                                         |
|---------------------------------------------------------------------------------------------------------------------|-----------------------|---------------------------------------------------------|
| <b>Population Group</b>                                                                                             | <b>Total patients</b> | <b>Average <i>HLA-B*57:01</i> carrier frequency (%)</b> |
| European                                                                                                            | 35,630                | 6.8                                                     |
| South American                                                                                                      | 1,321                 | 2.6                                                     |
| African                                                                                                             | 8,570                 | 1.0                                                     |
| Middle Eastern                                                                                                      | 1,029                 | 2.5                                                     |
| Mexican                                                                                                             | 3,391                 | 2.2                                                     |
| Asian                                                                                                               | 12,175                | 1.6 <sup>3</sup>                                        |
| Southwest Asian                                                                                                     | 326                   | 11.0                                                    |

<sup>1</sup>Average allele frequencies are reported based on the average from the actual numbers of subjects with each allele reported in multiple studies. See Supplemental Table S2 for references.

<sup>2</sup>Racial/ethnic group designations correspond to those indicated in Supplemental Table S2.

<sup>3</sup>Carrier frequency varies from 0-6.7% in this population. For estimates from specific geographic regions refer to Table S2.
