# Supplementary material
Source: PubMed Central journal article supplement (PMC3374459)
Supplement: clpt2011355x4.pdf [file clpt2011355x4.pdf]

| <b>Supplemental Table S2</b>                                                           |                                                       |                                          |                    |
|----------------------------------------------------------------------------------------|-------------------------------------------------------|------------------------------------------|--------------------|
| <b>Detailed table with all references and clear assignment of racial/ethnic groups</b> |                                                       |                                          |                    |
| <b>Pooled Grouping</b>                                                                 | <b>Ethnicity</b>                                      | <b>HLA-B*57:01 carrier frequency (%)</b> | <b>Sample Size</b> |
| European                                                                               | Australian (New South Wales) Caucasian <sup>1</sup>   | 0.0                                      | 134                |
| European                                                                               | Austrian <sup>1</sup>                                 | 5.5                                      | 200                |
| European                                                                               | Azorean <sup>14</sup>                                 | 5.6                                      | 231                |
| European                                                                               | Belgian <sup>1</sup>                                  | 4.0                                      | 99                 |
| European                                                                               | British/Caucasian <sup>15</sup>                       | 8.5                                      | 577                |
| European                                                                               | British <sup>16</sup>                                 | 7.9                                      | 618                |
| European                                                                               | Bulgarian <sup>17</sup>                               | 3.6                                      | 55                 |
| European                                                                               | Caucasian <sup>8</sup>                                | 6.7                                      | 718                |
| European                                                                               | Caucasian <sup>18</sup>                               | 7.6                                      | 523                |
| European                                                                               | Caucasian <sup>19</sup>                               | 10.1                                     | 375                |
| European                                                                               | Caucasian <sup>20</sup>                               | 4.2                                      | 265                |
| European                                                                               | Caucasian <sup>21</sup>                               | 9.0                                      | 1,238              |
| European                                                                               | Caucasian <sup>22</sup>                               | 7.7                                      | 7,868              |
| European                                                                               | Caucasian <sup>1</sup>                                | 6.2                                      | 129                |
| European                                                                               | Caucasian <sup>23</sup>                               | 7.3                                      | 537                |
| European                                                                               | Caucasian <sup>1</sup>                                | 3.7                                      | 135                |
| European                                                                               | Caucasian <sup>1</sup>                                | 6.0                                      | 166                |
| European                                                                               | Caucasian or White Arabic/North African <sup>24</sup> | 7.2                                      | 443                |
| European                                                                               | Croatian <sup>1</sup>                                 | 4.0                                      | 150                |
| European                                                                               | Cuban Caucasian <sup>25</sup>                         | 7.1                                      | 70                 |
| European                                                                               | Czech <sup>1</sup>                                    | 6.6                                      | 106                |
| European                                                                               | Dutch <sup>16</sup>                                   | 7.0                                      | 229                |
| European                                                                               | Eastern European Americans <sup>26</sup>              | 2.8                                      | 558                |
| European                                                                               | Finnish <sup>16</sup>                                 | 2.2                                      | 93                 |
| European                                                                               | Finnish <sup>1</sup>                                  | 3.3                                      | 91                 |
| European                                                                               | French <sup>16</sup>                                  | 6.8                                      | 1,798              |
| European                                                                               | French <sup>1</sup>                                   | 6.9                                      | 130                |
| European                                                                               | Georgian <sup>27</sup>                                | 5.6                                      | 160                |
| European                                                                               | Georgian <sup>1</sup>                                 | 1.8                                      | 109                |
| European                                                                               | German <sup>16</sup>                                  | 7.7                                      | 1,717              |
| European                                                                               | German <sup>28</sup>                                  | 6.6                                      | 8,862              |
| European                                                                               | Irish <sup>16</sup>                                   | 5.6                                      | 142                |
| European                                                                               | Irish (Northern) <sup>29</sup>                        | 7.5                                      | 1,000              |
| European                                                                               | Irish (Southern) <sup>1</sup>                         | 11.2                                     | 250                |
| European                                                                               | Italian <sup>16</sup>                                 | 6.3                                      | 1,545              |
| European                                                                               | Macedonian <sup>1</sup>                               | 3.2                                      | 216                |
| European                                                                               | Madeiran <sup>30</sup>                                | 3.2                                      | 185                |
| European                                                                               | Polish <sup>31</sup>                                  | 4.7                                      | 234                |
| European                                                                               | Polish <sup>32</sup>                                  | 5.0                                      | 200                |
| European                                                                               | Portuguese <sup>16</sup>                              | 1.9                                      | 108                |
| European                                                                               | Romanian <sup>1</sup>                                 | 1.4                                      | 348                |
| European                                                                               | Serbian <sup>1</sup>                                  | 6.9                                      | 102                |

|                |                                                           |      |       |
|----------------|-----------------------------------------------------------|------|-------|
| European       | Spanish <sup>16</sup>                                     | 6.4  | 1,103 |
| European       | Spanish <sup>33</sup>                                     | 6.5  | 1,105 |
| European       | Spanish (Andalusia Gypsy) <sup>1</sup>                    | 14.1 | 99    |
| European       | Swedish (Northern Sami) <sup>34</sup>                     | 0.6  | 154   |
| European       | Swedish (Southern Sami) <sup>34</sup>                     | 3.8  | 130   |
| European       | Swiss <sup>16</sup>                                       | 10.2 | 325   |
| South American | American Indian <sup>16</sup> (includes Central American) | 3.1  | 161   |
| South American | American Indian <sup>20</sup>                             | 2.1  | 187   |
| South American | Argentinian (Toba) <sup>1</sup>                           | 2.3  | 86    |
| South American | Brazilian <sup>25</sup>                                   | 1.1  | 95    |
| South American | Chilean <sup>35</sup>                                     | 2.8  | 792   |
| African        | African/African American <sup>16</sup>                    | 0.3  | 1,578 |
| African        | African/African American <sup>24</sup>                    | 2.8  | 246   |
| African        | African/African American <sup>18</sup>                    | 9.0  | 134   |
| African        | African American <sup>19</sup>                            | 0.8  | 264   |
| African        | African American <sup>20</sup>                            | 2.4  | 251   |
| African        | African American <sup>36</sup>                            | 0.3  | 564   |
| African        | African American <sup>1</sup>                             | 2.1  | 94    |
| African        | African American <sup>22</sup>                            | 1.0  | 2,410 |
| African        | African American <sup>21</sup>                            | 2.2  | 587   |
| African        | Afro-Asiatic, Nilo-Saharan, or Khoisan <sup>15</sup>      | 0.0  | 61    |
| African        | Bissau-Guinean <sup>37</sup>                              | 0.0  | 65    |
| African        | Black Caribbean/African American <sup>15</sup>            | 0.0  | 61    |
| African        | Cameroonian <sup>38</sup>                                 | 0.0  | 92    |
| African        | Cape Verdean <sup>37</sup>                                | 3.2  | 124   |
| African        | Kenyan <sup>1</sup>                                       | 0.7  | 144   |
| African        | Kenyan Luo <sup>39</sup>                                  | 0.8  | 265   |
| African        | Kenyan Nandi <sup>39</sup>                                | 0.8  | 240   |
| African        | Malian <sup>39</sup>                                      | 0.0  | 138   |
| African        | Nigerian/Congolese (Bantu) <sup>15</sup>                  | 0.2  | 514   |
| African        | South African (Zulu) <sup>25</sup>                        | 0.0  | 100   |
| African        | Ugandan <sup>40</sup>                                     | 0.0  | 247   |
| African        | Ugandan <sup>39</sup>                                     | 3.1  | 161   |
| African        | Zimbabwean (Shona) <sup>1</sup>                           | 0.9  | 230   |
| Middle Eastern | Iranian (Baloch) <sup>41</sup>                            | 2.0  | 100   |
| Middle Eastern | Israeli <sup>1</sup>                                      | 1.8  | 109   |
| Middle Eastern | Israeli (Druze) <sup>1</sup>                              | 3.0  | 101   |
| Middle Eastern | Jordanian <sup>42</sup>                                   | 2.1  | 146   |
| Middle Eastern | Moroccan (Berber) <sup>43</sup>                           | 2.9  | 69    |
| Middle Eastern | Moroccan (Chaouya) <sup>44</sup>                          | 5.5  | 73    |
| Middle Eastern | Omani <sup>25</sup>                                       | 2.5  | 118   |
| Middle Eastern | Saudi Arabian <sup>1</sup>                                | 0.5  | 213   |
| Middle Eastern | Tunisian <sup>45</sup>                                    | 6.0  | 100   |
| Mexican        | Mexican mestizo <sup>46</sup>                             | 1.0  | 103   |
| Mexican        | Mexican (Mixe) <sup>47</sup>                              | 1.9  | 52    |

|         |                                                          |     |       |
|---------|----------------------------------------------------------|-----|-------|
| Mexican | Mexican (Mixtec) <sup>47</sup>                           | 0.0 | 51    |
| Mexican | Mexican (Zapotec) <sup>47</sup>                          | 0.0 | 66    |
| Mexican | Mexican American <sup>48</sup>                           | 4.0 | 553   |
| Mexican | Pima Indian <sup>49</sup>                                | 0.0 | 218   |
| Mexican | US Hispanic <sup>20</sup>                                | 1.9 | 234   |
| Mexican | US Hispanic <sup>22</sup>                                | 2.2 | 1,999 |
| Mexican | US Hispanic <sup>1</sup>                                 | 1.7 | 115   |
| Asian   | Alaskan Native (Yup'ik) <sup>50</sup>                    | 0.0 | 252   |
| Asian   | Asian <sup>16</sup>                                      | 4.0 | 149   |
| Asian   | Asian American <sup>20</sup>                             | 1.0 | 358   |
| Asian   | Asian American <sup>22</sup>                             | 4.1 | 1,767 |
| Asian   | Australian (Cape York Peninsula) Aborigines <sup>1</sup> | 3.0 | 100   |
| Asian   | Australian (Groote Eylandt) Aborigines <sup>1</sup>      | 1.3 | 75    |
| Asian   | Australian (Yuendumu) Aborigines <sup>1</sup>            | 0.0 | 191   |
| Asian   | Buryat (Eastern Siberia) <sup>51</sup>                   | 2.4 | 148   |
| Asian   | Chinese (Beijing) <sup>1</sup>                           | 1.5 | 67    |
| Asian   | Chinese (Guangzhou) <sup>1</sup>                         | 0.0 | 102   |
| Asian   | Chinese-Korean <sup>51</sup>                             | 0.0 | 197   |
| Asian   | Han Chinese (Ghangzhou) <sup>52</sup>                    | 6.6 | 106   |
| Asian   | Hong Kong Chinese <sup>53</sup>                          | 0.3 | 572   |
| Asian   | Hui Chinese <sup>54</sup>                                | 1.8 | 110   |
| Asian   | Indonesian (Java) <sup>55</sup>                          | 2.5 | 236   |
| Asian   | Japanese <sup>56</sup>                                   | 0.0 | 274   |
| Asian   | Japanese <sup>51</sup>                                   | 0.0 | 1,500 |
| Asian   | Japanese <sup>57</sup>                                   | 0.0 | 371   |
| Asian   | Japanese <sup>58</sup>                                   | 0.0 | 117   |
| Asian   | Lakota Sioux (South Dakota) <sup>59</sup>                | 1.0 | 202   |
| Asian   | Man Chinese <sup>51</sup>                                | 2.6 | 171   |
| Asian   | Mongolian <sup>51</sup>                                  | 1.1 | 187   |
| Asian   | Mongolian <sup>54</sup>                                  | 3.9 | 102   |
| Asian   | Northern Han Chinese <sup>51</sup>                       | 2.6 | 196   |
| Asian   | Northern Han Chinese <sup>60</sup>                       | 1.9 | 618   |
| Asian   | Northern Han Chinese <sup>61</sup>                       | 6.7 | 105   |
| Asian   | Singapore-Chinese <sup>25</sup>                          | 0.0 | 149   |
| Asian   | Singapore-Han Chinese <sup>1</sup>                       | 1.1 | 94    |
| Asian   | Singapore-Javanese <sup>1</sup>                          | 3.9 | 51    |
| Asian   | Singapore-Riau Malay <sup>1</sup>                        | 4.5 | 132   |
| Asian   | South Korean <sup>62</sup>                               | 0.0 | 534   |
| Asian   | South Korean <sup>51</sup>                               | 0.5 | 212   |
| Asian   | South Korean <sup>63</sup>                               | 0.2 | 485   |
| Asian   | Taiwanese <sup>64</sup>                                  | 0.3 | 320   |
| Asian   | Taiwanese <sup>65</sup>                                  | 0.3 | 364   |
| Asian   | Taiwanese <sup>66</sup>                                  | 1.4 | 212   |
| Asian   | Taiwanese <sup>67</sup>                                  | 0.1 | 710   |
| Asian   | Thai <sup>1</sup>                                        | 3.5 | 142   |

|                 |                                       |      |     |
|-----------------|---------------------------------------|------|-----|
| Asian           | Tibetan <sup>68</sup>                 | 1.9  | 158 |
| Asian           | Tuvan (Southern Siberia) <sup>1</sup> | 6.5  | 169 |
| Asian           | Vietnamese (Kinh) <sup>69</sup>       | 5.9  | 170 |
| Southwest Asian | Indian (New Delhi) <sup>1</sup>       | 7.0  | 71  |
| Southwest Asian | Nadar (Southern) Indian <sup>70</sup> | 16.4 | 61  |
| Southwest Asian | Northern Indian <sup>71</sup>         | 9.9  | 91  |
| Southwest Asian | Northern Indian <sup>72</sup>         | 3.8  | 52  |
| Southwest Asian | South African (Tamil) <sup>1</sup>    | 19.6 | 51  |
| Southwest Asian | Southern Indian (Golla) <sup>1</sup>  | 5.4  | 111 |
