# Supplementary material
Source: PubMed Central journal article supplement (PMC3374459)
Supplement: clpt2011355x5.pdf [file clpt2011355x5.pdf]

**Supplemental Table S3**

**Evidence linking genotype with phenotype**

| <b>Type of experimental model (in vitro, in vivo preclinical, or clinical)</b> | <b>Major Findings</b>                                                                                                                                                                         | <b>References</b>                                                                                                                                                                                                                                                                                                                                                | <b>Level of Evidence</b> |
|--------------------------------------------------------------------------------|-----------------------------------------------------------------------------------------------------------------------------------------------------------------------------------------------|------------------------------------------------------------------------------------------------------------------------------------------------------------------------------------------------------------------------------------------------------------------------------------------------------------------------------------------------------------------|--------------------------|
| In vitro                                                                       | Peripheral blood mononuclear cells (PBMCs) from abacavir hypersensitive patients show CD8 proliferation when cultured with abacavir                                                           | Phillips et al <sup>73</sup> ,<br>Martin et al <sup>74</sup> ,<br>Chessman et al <sup>75</sup>                                                                                                                                                                                                                                                                   | High                     |
| In vitro                                                                       | PBMCs from abacavir hypersensitive patients have significantly higher levels of TNF-alpha when cultured with abacavir, compared to abacavir tolerant patients                                 | Martin et al <sup>74</sup> ,<br>Almeida et al <sup>76</sup> ,<br>Stekler et al <sup>77</sup>                                                                                                                                                                                                                                                                     | High                     |
| In vitro                                                                       | PBMCs from abacavir hypersensitive patients have significantly higher levels of interferon-gamma when cultured with abacavir, compared to abacavir tolerant patients                          | Martin et al <sup>78</sup> ,<br>Chessman et al <sup>75</sup> ,<br>Almeida et al <sup>76</sup> ,<br>Stekler et al <sup>77</sup>                                                                                                                                                                                                                                   | High                     |
| In vitro                                                                       | Culture with abacavir induces cytokine production in isolated CD8+ T cells in healthy abacavir-naïve <i>HLA-B*57:01</i> -positive patients, but not in those with closely related B57 alleles | Chessman et al <sup>75</sup>                                                                                                                                                                                                                                                                                                                                     | High                     |
| Clinical                                                                       | Presence of <i>HLA-B*57:01</i> is predictive of clinically diagnosed abacavir hypersensitivity                                                                                                | Zucman et al <sup>79</sup> ,<br>Mallal et al <sup>8</sup> ,<br>Hetherington et al <sup>80</sup> ,<br>Mallal et al <sup>81</sup> ,<br>Martin et al <sup>74</sup> ,<br>Hughes et al <sup>82</sup> ,<br>Stekler et al <sup>77</sup> ,<br>Rodriguez et al <sup>83</sup> ,<br>Saag et al <sup>84</sup> ,<br>Rauch et al <sup>85</sup> ,<br>Hughes et al <sup>86</sup> | High                     |
| Clinical                                                                       | Presence of <i>HLA-B*57:01</i> is predictive of immunologically confirmed (patch test)                                                                                                        | Phillips et al <sup>73</sup> ,<br>Mallal et al <sup>8</sup> , Saag                                                                                                                                                                                                                                                                                               | High                     |

|          |                                                                                                                                                                                                                            |                                                                                                                                                         |      |
|----------|----------------------------------------------------------------------------------------------------------------------------------------------------------------------------------------------------------------------------|---------------------------------------------------------------------------------------------------------------------------------------------------------|------|
|          | hypersensitivity                                                                                                                                                                                                           | et al <sup>84</sup>                                                                                                                                     |      |
| Clinical | Prospective screening of <i>HLA-B*57:01</i> reduces the incidence of clinically diagnosed abacavir hypersensitivity                                                                                                        | Rauch et al <sup>87</sup> ,<br>Waters et al <sup>18</sup> ,<br>Young et al <sup>24</sup> ,<br>Mallal et al <sup>8</sup> ,<br>Martin et al <sup>74</sup> | High |
| Clinical | Prospective screening of <i>HLA-B*57:01</i> reduces the incidence of immunologically confirmed (patch test) hypersensitivity                                                                                               | Rauch et al <sup>87</sup> ,<br>Young et al <sup>24</sup> ,<br>Mallal et al <sup>8</sup>                                                                 | High |
| Clinical | Abacavir skin patch testing results strongly correlate with presence of <i>HLA-B*57:01</i> and can still be reactive years after original presentation of abacavir hypersensitivity, indicating a durable immune response. | Phillips et al <sup>73</sup> ,<br>Phillips et al <sup>88</sup>                                                                                          | High |
