# Supplementary material
Source: PubMed Central journal article supplement (PMC3374459)
Supplement: clpt2011355x6.pdf [file clpt2011355x6.pdf]

## Supplemental Material

### Clinical Pharmacogenetics Implementation Consortium Guidelines for *HLA-B* Genotype and Abacavir Dosing

Michael A. Martin<sup>1</sup>, Teri E. Klein<sup>2</sup>, Betty J. Dong<sup>3</sup>, Munir Pirmohamed<sup>4</sup>, David W. Haas<sup>5</sup> and Deanna L. Kroetz<sup>1</sup>

<sup>1</sup>Departments of Bioengineering and Therapeutic Sciences and <sup>3</sup>Clinical Pharmacy, University of California, San Francisco, California USA, <sup>2</sup>Department of Genetics, Stanford University, Stanford, California USA, <sup>4</sup>Department of Pharmacology, University of Liverpool, Liverpool UK and <sup>5</sup>Department of Medicine, Vanderbilt University, Nashville, TN USA

#### CPIC Updates

Clinical Pharmacogenetics Implementation Consortium (CPIC) guidelines are published in full on the PharmGKB website ([www.pharmgkb.org](http://www.pharmgkb.org)). Relevant information will be periodically reviewed and updated guidelines will be published online.

#### Focused Literature Review

We searched the PubMed database (1966 to April 2011) and Ovid MEDLINE (1950 to April 2011) for keywords ((HLA OR HLA-B OR HLA-B57 OR HLA-B\*5701) AND (abacavir)), as well as a more general search for (abacavir hypersensitivity).

To construct a *HLA-B\*57:01* minor allele frequency table based on ethnicity, the PubMed® database (1966 to April 2011) and Ovid MEDLINE (1950 to April 2011) were searched using the following criteria: ((HLA-B OR HLA-B57 OR HLA-B\*5701) AND (genotype OR allele OR

frequency)) with filter limits set to retrieve “full-text” and “English” literature. Studies were considered for inclusion if, (1) the ethnicity of the population was clearly indicated; (2) either allele frequencies or alleles for *HLA-B\*57:01* genotypes were reported; (3) the method by which *HLA-B* was genotyped was reliable and proven (no proof-of-principle experiments); (4) the sample population consisted of at least 50 individuals, (5) the study represented publication of novel data (no reviews or meta-analyses) and (6) the population studied did not have any concomitant disease (such as autoimmune conditions) that would be expected to result in a distribution of *HLA-B* alleles that were different from the general population. In instances where genotype data from large cohorts of ethnically-diverse individuals were reported, without respect to ethnicity, studies were only considered if one ethnicity was  $\geq 95\%$  of the majority. Additional studies were also included from the Allele Frequency Net Database<sup>1</sup> ([www.allelefrequencies.net](http://www.allelefrequencies.net)), an online repository for HLA allele frequencies from both previously published and unpublished sources, if they met the previously described inclusion criteria. All previously published data were manually checked against the original publications to verify the *HLA-B\*57:01* allele frequencies. In some cases, sample sizes or allele frequencies were updated to reflect only subjects successfully genotyped for *HLA-B\*57:01* (rather than the total sample size of the study) or to correct errata in the original publication. The combined analysis included 35,630 Europeans, 1,321 South Americans, 8,570 Africans, 1,029 Middle Easterners, 3,391 Mexicans, 12,175 Asians, and 326 Southwest Asians.

### **HLA Allele Nomenclature**

Like many other genes, the different alleles of the HLA genes are assigned star (\*) designations based upon their nucleotide sequence. However, due to the significant number of genetic variants within these genes and the complexities involved in properly describing individual alleles, the World Health Organization (WHO) formed an official Nomenclature Committee for Factors of the HLA System tasked with standardizing the naming of HLA alleles. The

nomenclature was last updated in April 2010 and includes up to four sets of digits separated by colons, possibly followed by a letter suffix. This is significantly different than the star allele naming of other gene groups, such as the cytochrome P450s (CYPs), where the reference allele is denoted as \*1 and variant allele designations are typically only one to two digits in length. In the case of HLA-B, *HLA-B\*07:02:01* is used as the reference sequence because it was one of the first HLA alleles to be identified, due to its high prevalence in Caucasians, and was the first *HLA-B* allele sequenced by the WHO. As can be seen in Supplementary Figures S1 and S2, *HLA-B\*07:02:01* and *HLA-B\*57:01:01* differ by a significant number of nucleotides, which result in numerous amino acid changes.

Of note, previous versions of HLA nomenclature did not use colons and represented alleles as a string of four pairs of digits. Each pair of digits in the old nomenclature corresponds to each set of digits, separated by colons, in the new nomenclature. Further information on specific HLA locus star alleles, including their genomic and amino acid sequences, as well as related publications, can be found in the IMGT/HLA Database ([www.ebi.ac.uk/imgt/hla](http://www.ebi.ac.uk/imgt/hla)).

The first set of digits describes the “type” of the allele. Frequently these correspond to the “antigen” designation that was used to describe HLA alleles prior to the use of genetic sequencing. These antigen groups often have a biological and genetic basis and thus they have been kept in the current HLA nomenclature.

The second set of digits describes the “subtype” of the allele. The combination of the first and second set of digits can describe every HLA allele for which there is a nucleotide polymorphism that changes the amino acid sequence of the protein (i.e. a nonsynonymous substitution). For example, *HLA-B\*57:01* is of B57 “type” and 01 “subtype.” The closely related allele *HLA-B\*57:03* differs from *HLA-B\*57:01* by two nonsynonymous substitutions.

A third set of digits may be used to describe alleles that differ only by synonymous substitutions, meaning that the nucleotide polymorphisms do not result in a change in the amino acid sequence of the protein. A fourth set of digits may also be used to describe alleles that differ in non-coding regions, such as introns and the 5' or 3' flanking regions of exons. These sets of digits may or may not be needed to fully describe a given allele. For example, the HLA-B\*57:01 protein can actually be encoded by several different genetic sequences, *HLA-B\*57:01:01* through *HLA-B\*57:01:07*. These sequences are genetically distinct at the nucleotide level, but these genetic differences do not result in amino acid changes in the final protein.

Additionally, alleles may also be described by a letter suffix which describes the allele's protein expression. These suffixes include 'N' ("null," meaning that the allele does not express a functional protein), 'L' ("low" surface expression), 'S' (expressed as a soluble "secreted" protein, but not present on the cell surface), 'C' (protein present in "cytoplasm" but not on the cell surface), 'A' ("aberrant" expression, where there is uncertainty as to whether the protein is expressed), and 'Q' ("questionable" expression). If no letter suffix is given, as is the case with HLA-B\*57:01, it is assumed that the protein expresses normally.

### **Available Genetic Test Options & Interpretation**

Commercially available genetic testing options change over time. Information that may assist in evaluating options is available below, as well as on the Pharmacogenetic Tests section of PharmGKB ([http://pharmgkb.org/resources/forScientificUsers/pharmacogenomic\\_tests.jsp](http://pharmgkb.org/resources/forScientificUsers/pharmacogenomic_tests.jsp)).

Several different options are commercially available for detection of *HLA-B\*57:01*. One option is direct sequence-based typing, where the DNA coding for *HLA-B* is amplified and then fully sequenced. The sequence can then be checked against known *HLA-B* alleles and assigned the

proper star allele. The results of this test are reported as the diplotype of both *HLA-B* alleles. While this method does give high resolution genotyping and is the most accurate, it is also more time-consuming and expensive than other methods. Because full resolution of non-*\*57:01* alleles is not clinically relevant for abacavir hypersensitivity, direct sequence-based typing is not generally performed.

Another option is an allele-specific polymerase chain reaction<sup>2</sup> (PCR). This method involves the use of oligonucleotide probes that are designed to only amplify specific alleles. This type of testing may be clinically available as a bundle of tests across one or more HLA-related loci for the detection of multiple alleles (such as in transplant), but many clinical laboratories may also offer a single test for *HLA-B\*57:01*. The results of this test are either “positive” (*HLA-B\*57:01* is present) or “negative” (*HLA-B\*57:01* is not present). Quality assurance studies in multiple laboratories performing this test have shown extremely high sensitivity and specificity<sup>3</sup>, indicating that detection of *HLA-B\*57:01* is consistent between different labs. Example CPT codes from LabCorp for this test are: 83890 – molecular isolation or extraction (x1), 83893 – Dot/slot blot production (x3), 83896 – nucleic acid probe (x3), 83898 – amplification of patient nucleic acid (x1), and 83912 – interpretation and report (x1).

It is also possible to test for *HLA-B\*57:01* by checking for the presence of a nearby single nucleotide polymorphism (SNP) that is in linkage disequilibrium, meaning that it is co-inherited with *HLA-B\*57:01* and can be used as a surrogate marker. SNP rs2395029 is located in the nearby HLA complex P5 gene (*HCP5*) approximately 100 kilobases away from *HLA-B* and has been shown to significantly correlate with the presence of *HLA-B\*57:01* in Caucasians<sup>4,5</sup> and Hispanics<sup>6</sup>. While published studies show a sensitivity of 100% (i.e., all patients tested that were *HLA-B\*57:01*-positive also had the rs2395029 variant), rare recombination events between *HLA-B* and *HCP5* do lead to a lower positive predictive value of approximately 94% (i.e., 6% of

patients that test positive for the rs2395029 variant will not be *HLA-B\*57:01*-positive). This will lead to misclassification of some patients due to the indirect nature of the test and will result in denial of abacavir to individuals that are not at increased risk of hypersensitivity. However, because of the greater ease of use of this test, some clinical laboratories choose to perform SNP testing over allele-specific PCR. Example CPT codes from ARUP for this test are: 83891 – isolation (x1), 83898 – amplification (x1), 83896 – nucleic acid probe (x2), 83912 – interpretation and report (x1). One important caveat to this test is that the linkage between rs2395029 and *HLA-B\*57:01* has not been explored in large African or Asian cohorts. While rates of *HLA-B\*57:01* are already lower in these populations than in Caucasians, there is the potential that the linkage in these populations may not be as strong and could lead to misclassification of genotype.

Additionally, *HLA-B* alleles may also be detected using flow cytometry. Researchers have produced a monoclonal antibody that detects the B57 and B58 serotypes<sup>7</sup> and correlates very strongly with sequence-based typing. While this method cannot by itself distinguish between *HLA-B\*57:01* and other B57 or B58 non-risk alleles, it does provide an easy method of identifying individuals that do not carry *HLA-B\*57:01*, do not require further sequence-based typing, and may be safely given abacavir. This method does not appear to be currently commercially available, but may be of some use in settings where sequence-based typing is not available.

Clinicians should always be mindful of which method of testing is being used when interpreting the test results. Regardless of reported genotype, all cases of clinically diagnosed abacavir hypersensitivity should be taken seriously.

## **Abacavir Skin Patch Testing**

Abacavir skin patch testing, although not commercially available, may be a useful complementary test in individuals with clinically diagnosed HSR. It involves the use of a range of abacavir concentrations placed on a patch on an individual's back, which can then be examined for an inflammatory reaction on the skin. Data from prospective trials, such as PREDICT-1, has shown that only around only one-third of clinically diagnosed hypersensitivity is actually immunologically confirmed<sup>8</sup>, suggesting either a high false-positive rate in clinical diagnosis, low sensitivity of patch testing, other non-immune mechanisms contributing to abacavir adverse events, or some combination thereof. While a positive skin patch test may increase confidence in a clinically diagnosed HSR, a negative skin patch test does not exclude the possibility that a patient had abacavir HSR. Due to the inability to readminister abacavir orally to confirm HSR, it is difficult to assess the correlation of skin patch test results with “true” HSR. Consequently, while it has utility in a research setting, the test is not routinely used in mainstream clinical practice.

## **Levels of Evidence linking genotype to phenotype**

The evidence summarized in Supplemental Table S3 is graded<sup>9</sup> on a scale of high, moderate, and weak, based upon the level of evidence:

**High:** Evidence includes consistent results from well-designed, well-conducted studies.

**Moderate:** Evidence is sufficient to determine effects, but the strength of the evidence is limited by the number, quality, or consistency of the individual studies, generalizability to routine practice, or indirect nature of the evidence.

**Weak:** Evidence is insufficient to assess the effects on health outcomes because of limited number or power of studies, important flaws in their design or conduct, gaps in the chain of evidence, or lack of information.

Every effort was made to present evidence from high-quality studies, which provided the framework for the strength of therapeutic recommendations in Table 2.

### **Strength of Recommendations**

We chose to use a slight modification of a transparent and simple system<sup>9</sup> with just three categories for recommendations: strong, where “the evidence is high quality and the desirable effects clearly outweigh the undesirable effects”; moderate, in which “there is a close or uncertain balance” as to whether the evidence is high quality and the desirable clearly outweigh the undesirable effects; and optional, for recommendations in-between strong and weak where there is room for differences in opinion as to the need for the recommended course of action. CPIC’s dosing recommendations are based weighing the evidence from a combination of preclinical functional and clinical data, as well as on some existing disease-specific consensus guidelines<sup>10-13</sup>. Some of the factors that are taken into account include *in vitro* cytokine profiling of abacavir-stimulated immune cells in patients with various *HLA-B* alleles, as well as both retrospective and prospective *in vivo* clinical outcome data for abacavir. Overall, the dosing recommendations are simplified to allow rapid interpretation by clinicians. They have been adopted from the rating scale for evidence-based therapeutic recommendations on the use of retroviral agents<sup>11</sup>.

A: Strong recommendation for the statement

B: Moderate recommendation for the statement

C: Optional recommendation for the statement



## References

1. Gonzalez-Galarza, F.F., Christmas, S., Middleton, D. & Jones, A.R. Allele frequency net: a database and online repository for immune gene frequencies in worldwide populations. *Nucleic acids research* **39**, D913-9 (2011).
2. Martin, A.M., Nolan, D. & Mallal, S. HLA-B\*5701 typing by sequence-specific amplification: validation and comparison with sequence-based typing. *Tissue antigens* **65**, 571-4 (2005).
3. Hammond, E. et al. External quality assessment of HLA-B\*5701 reporting: an international multicentre survey. *Antiviral therapy* **12**, 1027-32 (2007).
4. Colombo, S. et al. The HCP5 single-nucleotide polymorphism: a simple screening tool for prediction of hypersensitivity reaction to abacavir. *The Journal of infectious diseases* **198**, 864-7 (2008).
5. Rodríguez-Nóvoa, S. et al. Use of the HCP5 single nucleotide polymorphism to predict hypersensitivity reactions to abacavir: correlation with HLA-B\*5701. *The Journal of antimicrobial chemotherapy* **65**, 1567-9 (2010).
6. Sanchez-Giron, F. et al. Association of the genetic marker for abacavir hypersensitivity HLA-B\*5701 with HCP5 rs2395029 in Mexican Mestizos. *Pharmacogenomics* **12**, 1-6 (2011).
7. Kostenko, L. et al. Rapid screening for the detection of HLA-B57 and HLA-B58 in prevention of drug hypersensitivity. *Tissue antigens* 1-10 (2011).doi:10.1111/j.1399-0039.2011.01649.x
8. Mallal, S. et al. HLA-B\*5701 screening for hypersensitivity to abacavir. *The New England journal of medicine* **358**, 568-79 (2008).
9. Valdes, R., Payne, D.A. & Linder, M.W. Laboratory analysis and application of pharmacogenetics to clinical practice. *The National Academy of Clinical Biochemistry (NACB) - Laboratory Medicine Practice Guidelines* (2010).
10. Gazzard, B.G. British HIV Association guidelines for the treatment of HIV-1-infected adults with antiretroviral therapy 2008. *HIV medicine* **9**, 563-608 (2008).
11. Panel on Antiretroviral Guidelines for Adults and Adolescents. Guidelines for the use of antiretroviral agents in HIV-1-infected adults and adolescents. Department of Health and Human Services. 1-166 (2011).

12. Becquemont, L. et al. Practical recommendations for pharmacogenomics-based prescription: 2010 ESF–UB Conference on Pharmacogenetics and Pharmacogenomics. *Pharmacogenomics* **12**, 113–124 (2011).
13. Swen, J.J. et al. Pharmacogenetics: From Bench to Byte- An Update of Guidelines. *Clinical pharmacology and therapeutics* **89**, 662-73 (2011).
14. Spínola, H., Brehm, a, Bettencourt, B., Middleton, D. & Bruges-Armas, J. HLA class I and II polymorphisms in Azores show different settlements in Oriental and Central islands. *Tissue antigens* **66**, 217-30 (2005).
15. Orkin, C., Sadiq, S.T., Rice, L. & Jackson, F. Prospective epidemiological study of the prevalence of human leukocyte antigen (HLA)-B\*5701 in HIV-1-infected UK subjects. *HIV medicine* **11**, 187-92 (2010).
16. Orkin, C. et al. An epidemiologic study to determine the prevalence of the HLA-B\*5701 allele among HIV-positive patients in Europe. *Pharmacogenetics and genomics* **20**, 307-14 (2010).
17. Ivanova, M. et al. HLA polymorphism in Bulgarians defined by high-resolution typing methods in comparison with other populations. *Tissue antigens* **60**, 496-504 (2002).
18. Waters, L.J., Mandalia, S., Gazzard, B. & Nelson, M. Prospective HLA-B\*5701 screening and abacavir hypersensitivity: a single centre experience. *AIDS* **21**, 2533 (2007).
19. Watson, M.E. et al. A study of HIV provider attitudes toward HLA-B\*5701 testing in the United States. *AIDS patient care and STDs* **23**, 957-63 (2009).
20. Cao, K. et al. Analysis of the frequencies of HLA-A, B, and C alleles and haplotypes in the five major ethnic groups of the United States reveals high levels of diversity in these loci and contrasting distribution patterns in these populations. *Human immunology* **62**, 1009-30 (2001).
21. Gao, X. et al. Diversity of MICA and linkage disequilibrium with HLA-B in two North American populations. *Human immunology* **67**, 152-8 (2006).
22. Maiers, M., Gragert, L. & Klitz, W. High-resolution HLA alleles and haplotypes in the United States population. *Human immunology* **68**, 779-88 (2007).
23. Wang, S.S. et al. Human leukocyte antigen class I and II alleles in non-Hodgkin lymphoma etiology. *Blood* **115**, 4820-3 (2010).
24. Young, B. et al. First large, multicenter, open-label study utilizing HLA-B\*5701 screening for abacavir hypersensitivity in North America. *AIDS* **22**, 1673 (2008).

25. Williams, F. et al. Analysis of the distribution of HLA-B alleles in populations from five continents. *Human immunology* **62**, 645-50 (2001).
26. Mack, S.J. et al. HLA-A, -B, -C, and -DRB1 allele and haplotype frequencies distinguish Eastern European Americans from the general European American population. *Tissue antigens* **73**, 17-32 (2009).
27. Dvali, N., Chkhartishvili, N., Sharvadze, L., Karchava, M. & Tsertsvadze, T. HLA-B\*5701 genetic screening prior to abacavir prescription in Georgia. *Georgian Medical News* 16-20 (2010).
28. Schmidt, A.H. et al. Estimation of high-resolution HLA-A, -B, -C, -DRB1 allele and haplotype frequencies based on 8862 German stem cell donors and implications for strategic donor registry planning. *Human immunology* **70**, 895-902 (2009).
29. Middleton, D., Williams, F., Hamill, M. & Meenagh, A. Frequency of HLA-B alleles in a Caucasoid population determined by a two-stage PCR-SSOP typing strategy. *Human immunology* **61**, 1285-97 (2000).
30. Spínola, H., Bruges-Armas, J., Mora, M.G., Middleton, D. & Brehm, A. HLA genes in Madeira Island (Portugal) inferred from sequence-based typing: footprints from different origins. *Molecular immunology* **43**, 1726-8 (2006).
31. Parczewski, M. et al. Introduction of pharmacogenetic screening for the human leucocyte antigen (HLA) B\*5701 variant in Polish HIV-infected patients. *HIV medicine* **11**, 345-8 (2010).
32. Nowak, J. et al. Allele and extended haplotype polymorphism of HLA-A, -C, -B, -DRB1 and -DQB1 loci in Polish population and genetic affinities to other populations. *Tissue antigens* **71**, 193-205 (2008).
33. Arrizabalaga, J. et al. Prevalence of HLA-B\*5701 in HIV-Infected Patients in Spain (Results of the EPI Study). *HIV Clinical Trials* **10**, 48-51 (2009).
34. Johansson, A., Ingman, M., Mack, S.J., Erlich, H. & Gyllensten, U. Genetic origin of the Swedish Sami inferred from HLA class I and class II allele frequencies. *European journal of human genetics* **16**, 1341-9 (2008).
35. Poggi, H., Vera, A., Lagos, M., Solari, S. & Rodríguez, P. HLA-B\*5701 frequency in Chilean HIV-infected patients and in general population. *Brazilian Journal of Infectious Diseases* **14**, 510-512 (2010).
36. Tu, B. et al. HLA-A, -B, -C, -DRB1 allele and haplotype frequencies in an African American population. *Tissue antigens* **69**, 73-85 (2007).

37. Spínola, H., Bruges-Armas, J., Middleton, D. & Brehm, A. HLA polymorphisms in Cabo Verde and Guiné-Bissau inferred from sequence-based typing. *Human immunology* **66**, 1082-92 (2005).
38. Ellis, J.M. et al. Diversity is demonstrated in class I HLA-A and HLA-B alleles in Cameroon, Africa: description of HLA-A\*03012, \*2612, \*3006 and HLA-B\*1403, \*4016, \*4703. *Tissue antigens* **56**, 291-302 (2000).
39. Cao, K. et al. Differentiation between African populations is evidenced by the diversity of alleles and haplotypes of HLA class I loci. *Tissue antigens* **63**, 293-325 (2004).
40. Munderi, P. et al. Distribution of HLA-B alleles in a Ugandan HIV-infected adult population: NORA pharmacogenetic substudy of DART. *Tropical medicine & international health* **16**, 200-204 (2011).
41. Farjadian, S. et al. Molecular analysis of HLA allele frequencies and haplotypes in Baloch of Iran compared with related populations of Pakistan. *Tissue antigens* **64**, 581-7 (2004).
42. Sánchez-Velasco, P., Karadsheh, N.S., García-Martín, A., Ruíz de Alegría, C. & Leyva-Cobián, F. Molecular Analysis of HLA Allelic Frequencies and Haplotypes in Jordanians and Comparison with Other Related Populations. *Human immunology* **62**, 901-9 (2001).
43. Piancatelli, D. et al. Human leukocyte antigen-A, -B, and -Cw polymorphism in a Berber population from North Morocco using sequence-based typing. *Tissue antigens* **63**, 158-172 (2004).
44. Canossi, a et al. Correlation between genetic HLA class I and II polymorphisms and anthropological aspects in the Chaouya population from Morocco (Arabic speaking). *Tissue antigens* **76**, 177-93 (2010).
45. Ayed, K., Ayed-Jendoubi, S., Sfar, I., Labonne, M.-P. & Gebuhrer, L. HLA class-I and HLA class-II phenotypic, gene and haplotypic frequencies in Tunisians by using molecular typing data. *Tissue antigens* **64**, 520-32 (2004).
46. Leal, C. a, Mendoza-Carrera, F., Rivas, F., Rodriguez-Reynoso, S. & Portilla-de Buen, E. HLA-A and HLA-B allele frequencies in a mestizo population from Guadalajara, Mexico, determined by sequence-based typing. *Tissue antigens* **66**, 666-73 (2005).
47. Hollenbach, J. et al. HLA diversity, differentiation, and haplotype evolution in Mesoamerican natives. *Human immunology* **62**, 378–390 (2001).
48. Klitz, W. et al. Four-locus high-resolution HLA typing in a sample of Mexican Americans. *Tissue antigens* **74**, 508-13 (2009).

49. Williams, R. et al. Molecular variation at the HLA-A, B, C, DRB1, DQA1, and DQB1 loci in full heritage American Indians in Arizona: private haplotypes and their evolution. *Tissue antigens* **74**, 520-33 (2009).
50. Leffell, M.S. et al. HLA antigens, alleles and haplotypes among the Yup'ik Alaska natives: report of the ASHI Minority Workshops, Part II. *Human immunology* **63**, 614-25 (2002).
51. Inoue, T. et al. Diversity of HLA-B17 alleles and haplotypes in East Asians and a novel Cw6 allele (Cw\*0604) associated with B\*5701. *Tissue antigens* **53**, 534-44 (1999).
52. Feng, M.L. et al. Study on the haplotypes of MICA and MICB microsatellite and HLA-B locus in the Guangzhou Han population. *Tissue antigens* **64**, 281–285 (2004).
53. Middleton, D. et al. HLA class I allele distribution of a Hong Kong Chinese population based on high-resolution PCR-SSOP typing. *Tissue antigens* **63**, 555-61 (2004).
54. Hong, W. et al. HLA class I polymorphism in Mongolian and Hui ethnic groups from Northern China. *Human immunology* **68**, 439-48 (2007).
55. Yuliwulandari, R. et al. Association of HLA-A, -B, and -DRB1 with pulmonary tuberculosis in western Javanese Indonesia. *Human immunology* **71**, 697-701 (2010).
56. Munkanta, M. et al. HLA-B polymorphism in Japanese HIV-1-infected long-term surviving hemophiliacs. *Viral immunology* **18**, 500-5 (2005).
57. Saito, S., Ota, S., Yamada, E., Inoko, H. & Ota, M. Allele frequencies and haplotypic associations defined by allelic DNA typing at HLA class I and class II loci in the Japanese population. *Tissue antigens* **56**, 522-9 (2000).
58. Tokunaga, K. et al. Sequence-based association analysis of HLA class I and II alleles in Japanese supports conservation of common haplotypes. *Immunogenetics* **46**, 199–205 (1997).
59. Leffell, M.S. et al. HLA alleles and haplotypes among the Lakota Sioux: report of the ASHI minority workshops, part III. *Human immunology* **65**, 78–89 (2004).
60. Yang, G. et al. HLA-A, -B, and -DRB1 polymorphism defined by sequence-based typing of the Han population in Northern China. *Tissue Antigens* **67**, 146-152 (2006).
61. Hong, W. et al. Distributions of HLA class I alleles and haplotypes in Northern Han Chinese. *Tissue antigens* **66**, 297–304 (2005).
62. Park, W.B. et al. Should HLA-B\*5701 screening be performed in every ethnic group before starting abacavir? *Clinical infectious diseases* **48**, 365-7 (2009).

63. Lee, K.W., Oh, D.H., Lee, C. & Yang, S.Y. Allelic and haplotypic diversity of HLA-A, -B, -C, -DRB1, and -DQB1 genes in the Korean population. *Tissue antigens* **65**, 437-47 (2005).
64. Sun, H.-Y. et al. Incidence of abacavir hypersensitivity and its relationship with HLA-B\*5701 in HIV-infected patients in Taiwan. *The Journal of antimicrobial chemotherapy* **60**, 599-604 (2007).
65. Yang, K.-L., Chen, S.-P., Shyr, M.-H. & Lin, P.-Y. High-resolution human leukocyte antigen (HLA) haplotypes and linkage disequilibrium of HLA-B and -C and HLA-DRB1 and -DQB1 alleles in a Taiwanese population. *Human immunology* **70**, 269-76 (2009).
66. Yu, K.J. et al. Association of human leukocyte antigens with nasopharyngeal carcinoma in high-risk multiplex families in Taiwan. *Human immunology* **70**, 910-4 (2009).
67. Wen, S.-H., Lai, M.-J. & Yang, K.-L. Human leukocyte antigen-A, -B, and -DRB1 haplotypes of cord blood units in the Tzu Chi Taiwan Cord Blood Bank. *Human immunology* **69**, 430-6 (2008).
68. Chen, S. et al. Allelic distribution of HLA class I genes in the Tibetan ethnic population of China. *International journal of immunogenetics* **33**, 439-45 (2006).
69. Hoa, B.K. et al. HLA-A, -B, -C, -DRB1 and -DQB1 alleles and haplotypes in the Kinh population in Vietnam. *Tissue antigens* **71**, 127-34 (2008).
70. Shankarkumar, U., Sridharan, B. & Pitchappan, R.M. HLA diversity among Nadars, a primitive Dravidian caste of South India. *Tissue antigens* **62**, 542-7 (2003).
71. Rani, R., Marcos, C., Lazaro, A.M., Zhang, Y. & Stastny, P. Molecular diversity of HLA-A, -B and -C alleles in a North Indian population as determined by PCR-SSOP. *International journal of immunogenetics* **34**, 201-8 (2007).
72. Rajalingam, R. et al. Distinctive KIR and HLA diversity in a panel of north Indian Hindus. *Immunogenetics* **53**, 1009-19 (2002).
73. Phillips, E.J. et al. Clinical and immunogenetic correlates of abacavir hypersensitivity. *AIDS* **19**, 979 (2005).
74. Martin, A.M. et al. Predisposition to abacavir hypersensitivity conferred by HLA-B\*5701 and a haplotypic Hsp70-Hom variant. *Proceedings of the National Academy of Sciences of the United States of America* **101**, 4180-5 (2004).
75. Chessman, D. et al. Human leukocyte antigen class I-restricted activation of CD8+ T cells provides the immunogenetic basis of a systemic drug hypersensitivity. *Immunity* **28**, 822-32 (2008).

76. Almeida, C. et al. Cytokine profiling in abacavir hypersensitivity patients. *Antiviral therapy* **13**, 281 (2008).
77. Stekler, J. et al. Abacavir hypersensitivity reaction in primary HIV infection. *AIDS* **20**, 1269-74 (2006).
78. Martin, A.M. et al. Immune responses to abacavir in antigen-presenting cells from hypersensitive patients. *AIDS* **21**, 1233-44 (2007).
79. Zucman, D., Truchis, P.D., Majerholc, C., Stegman, S. & Caillat-Zucman, S. Prospective screening for human leukocyte antigen-B\*5701 avoids abacavir hypersensitivity reaction in the ethnically mixed French HIV population. *Journal of acquired immune deficiency syndromes* **45**, 1-3 (2007).
80. Hetherington, S. et al. Genetic variations in HLA-B region and hypersensitivity reactions to abacavir. *The Lancet* **359**, 1121–1122 (2002).
81. Mallal, S. et al. Association between presence of HLA-B\*5701, HLA-DR7, and HLA-DQ3 and hypersensitivity to HIV-1 reverse-transcriptase inhibitor abacavir. *The Lancet* **359**, 727–732 (2002).
82. Hughes, A.R. et al. Association of genetic variations in HLA-B region with hypersensitivity to abacavir in some, but not all, populations. *Pharmacogenomics* **5**, 203-11 (2004).
83. Rodríguez-Nóvoa, S. et al. Value of the HLA-B\*5701 allele to predict abacavir hypersensitivity in Spaniards. *AIDS research and human retroviruses* **23**, 1374-6 (2007).
84. Saag, M. et al. High sensitivity of human leukocyte antigen-b\*5701 as a marker for immunologically confirmed abacavir hypersensitivity in white and black patients. *Clinical infectious diseases* **46**, 1111-8 (2008).
85. Rauch, A. et al. Refining abacavir hypersensitivity diagnoses using a structured clinical assessment and genetic testing in the Swiss HIV Cohort Study. *Antiviral Therapy* **13**, 1019–28 (2008).
86. Hughes, D.A. et al. Cost-effectiveness analysis of HLA B\*5701 genotyping in preventing abacavir hypersensitivity. *Pharmacogenetics and Genomics* **14**, 335 (2004).
87. Rauch, A. et al. Prospective genetic screening decreases the incidence of abacavir hypersensitivity reactions in the Western Australian HIV cohort study. *Clinical infectious diseases* **43**, 99-102 (2006).
88. Phillips, E.J., Sullivan, J.R., Knowles, S.R. & Shear, N.H. Utility of patch testing in patients with hypersensitivity syndromes associated with abacavir. *AIDS* **16**, 2223-2225 (2002).
